# Supplementary material
Source: MDPI journal article supplement (https://www.mdpi.com/2071-1050/9/8/1345)

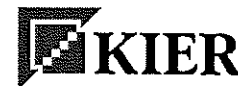

## 11. Metering, Monitoring & Targeting Strategy

### Metering schematic

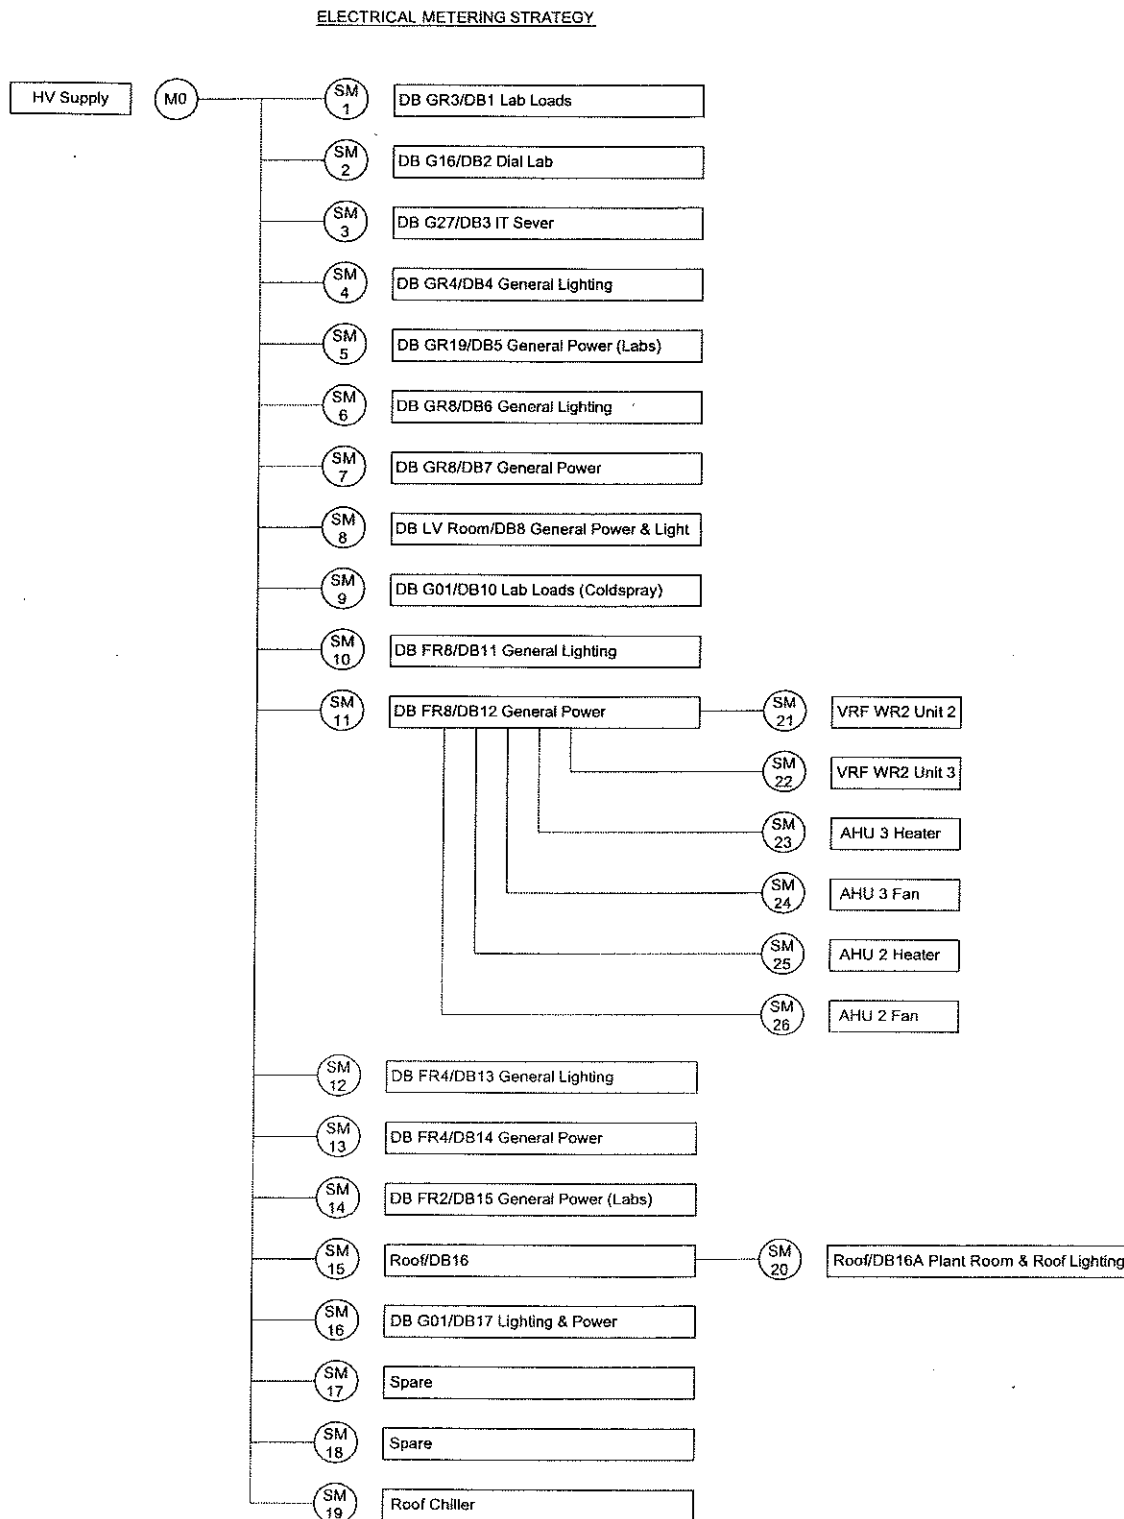

Supplement: s1 [file s1]
